# Supplementary material for: Gas phase ion chemistry of titanium–oxofullerene with ligated solvents
Source: Royal Society of Chemistry journal article supplement (doi:10.1039/d1cp04716g), 2022-01-01
Supplement: d1cp04716g1.pdf [file d1cp04716g1.pdf]

## Electronic Supplementary Information

# Gas Phase Ion Chemistry of Titanium-Oxofullerene With Ligated Solvents

Jayoti Roy<sup>‡</sup>, Papri Chakraborty<sup>‡</sup>, Ganesan Paramasivam, Ganapati Natarajan<sup>§</sup>, and  
Thalappil Pradeep\*

DST Unit of Nanoscience (DST UNS) & Thematic Unit of Excellence (TUE), Department of  
Chemistry, Indian Institute of Technology Madras, Chennai 600036, India.

International Centre for Clean Water (ICCW), IIT Madras Research Park, Taramani, Chennai  
6000113, India.

### Table of Contents

| List of Figures | Description                                                                                                | Page Number |
|-----------------|------------------------------------------------------------------------------------------------------------|-------------|
| Fig. S1         | UV-vis absorption spectrum of TOF                                                                          | S3          |
| Fig. S2         | Expanded mass spectra                                                                                      | S4          |
| Fig. S3         | CID mass spectrum with increasing collision energy                                                         | S5          |
| Fig. S4         | CID mass spectra with increase of collision energy                                                         | S6          |
| Fig. S5         | CID mass spectra at larger collision energies                                                              | S7          |
| Fig. S6         | CID mass spectrum of $[H_{12}Ti_{42}O_{60}(OCH_3)_{42}(HOCH_3)_{10}(H_2O)_2]^{2-}$ at 400 CE               | S8          |
| Fig. S7         | Expanded views of the calculated and experimental isotopic distributions of Ti-O cage fragments            | S9          |
| Fig. S8         | CID mass spectra of $[H_7Ti_{42}O_{60}(OCH_3)_{42}(HOCH_3)_{10}(H_2O)_3]^{1-}$ at varying collision energy | S10         |
| Fig. S9         | Stacked mass spectra of 1 at 200 CE and 2 at 400 CE                                                        | S11         |
| SI1             | Additional details of computational study                                                                  | S11         |

|          |                                                                                                                                                                                                                                                                                                  |     |
|----------|--------------------------------------------------------------------------------------------------------------------------------------------------------------------------------------------------------------------------------------------------------------------------------------------------|-----|
| Fig. S10 | Theoretically optimized structures of <b>1</b>                                                                                                                                                                                                                                                   | S12 |
| SI2      | Explanation for the difference in charges between protonated and unprotonated $[\text{Ti}_{42}\text{O}_{60}(\text{MeO})_{42}(\text{MeOH})_{10}(\text{H}_2\text{O})_2]$                                                                                                                           | S12 |
| S11      | Various binding modes and types of electron donation of the methoxide ligand with the Ti1 centre, obtained from DFT models                                                                                                                                                                       | S12 |
| S12      | Theoretically optimized structure of $[\text{H}_{12}\text{Ti}_{42}\text{O}_{60}(\text{CH}_3\text{O})_{42}(\text{CH}_3\text{OH})_{10}(\text{H}_2\text{O})_2]^{2-}$                                                                                                                                | S13 |
| S13      | Theoretically optimized structures of intermediates (i) $\{\text{H}_{12}\text{Ti}_{42}\text{O}_{60}(\text{CH}_3\text{O})_{30}(\text{CH}_3\text{OH})_{10}(\text{H}_2\text{O})_2\}^{2-}$ (ii) $\{\text{H}_{12}\text{Ti}_{41}\text{O}_{58}(\text{CH}_3\text{OH})_{10}(\text{H}_2\text{O})_2\}^{2-}$ | S14 |
| Table S1 | Electron count for various constituents of $\text{H}_6[\text{Ti}_{42}\text{O}_{60}(\text{OCH}_3)_{42}(\text{OH})_{12}]$                                                                                                                                                                          | S15 |
| Table S2 | Comparison of Bader charges of the caged methanol molecules in cluster <b>1</b> . Labels 1, 2, 3, 4, 5, 6, 7, 8, 9 and 10 refer to each of the 10 methanol molecules                                                                                                                             | S16 |
| Table S3 | Comparison of Bader charges of caged water molecules in the isolated molecule case and in cluster <b>1</b>                                                                                                                                                                                       | S19 |
| Table S4 | Average Bader charges of ligated molecules in $[\text{Ti}_{42}(\mu_3\text{-O})_{60}(\text{OCH}_3)_{42}(\text{OH})_{12}]^{6-}$ [computed structure for (TOF)] and in cluster <b>1</b> .                                                                                                           | S19 |

1  
2  
3  
4  
5  
6  
7  
8  
9  
10  
11

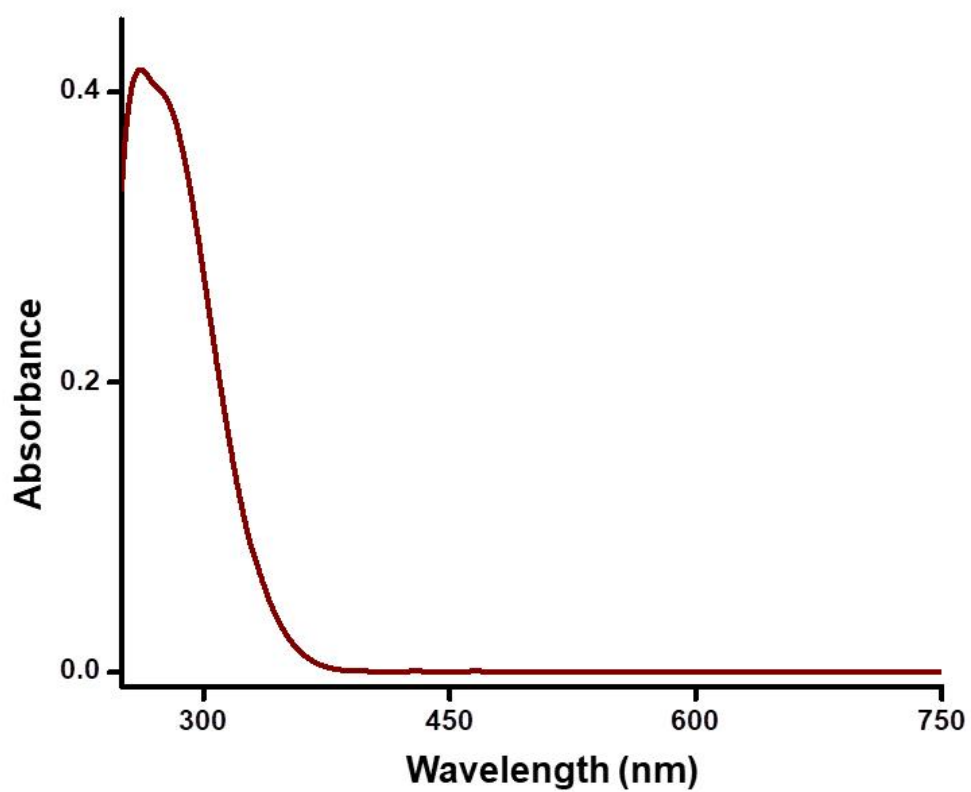

**Fig. S1** Solution phase UV-vis absorption spectrum of TOF in toluene.

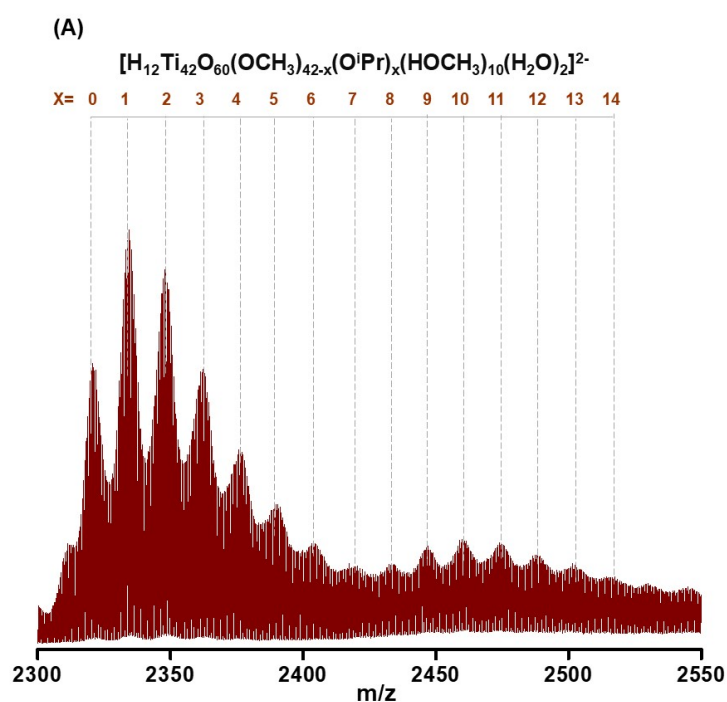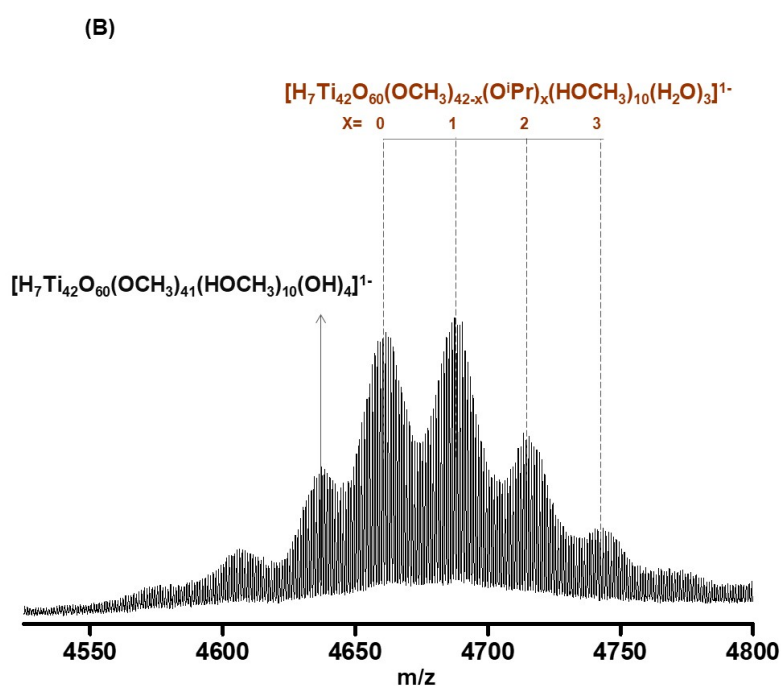

**Fig. S2** Expanded view of ESI MS of TOF in the range (A) m/z 2330-2550 and (B) m/z 4525-4800.

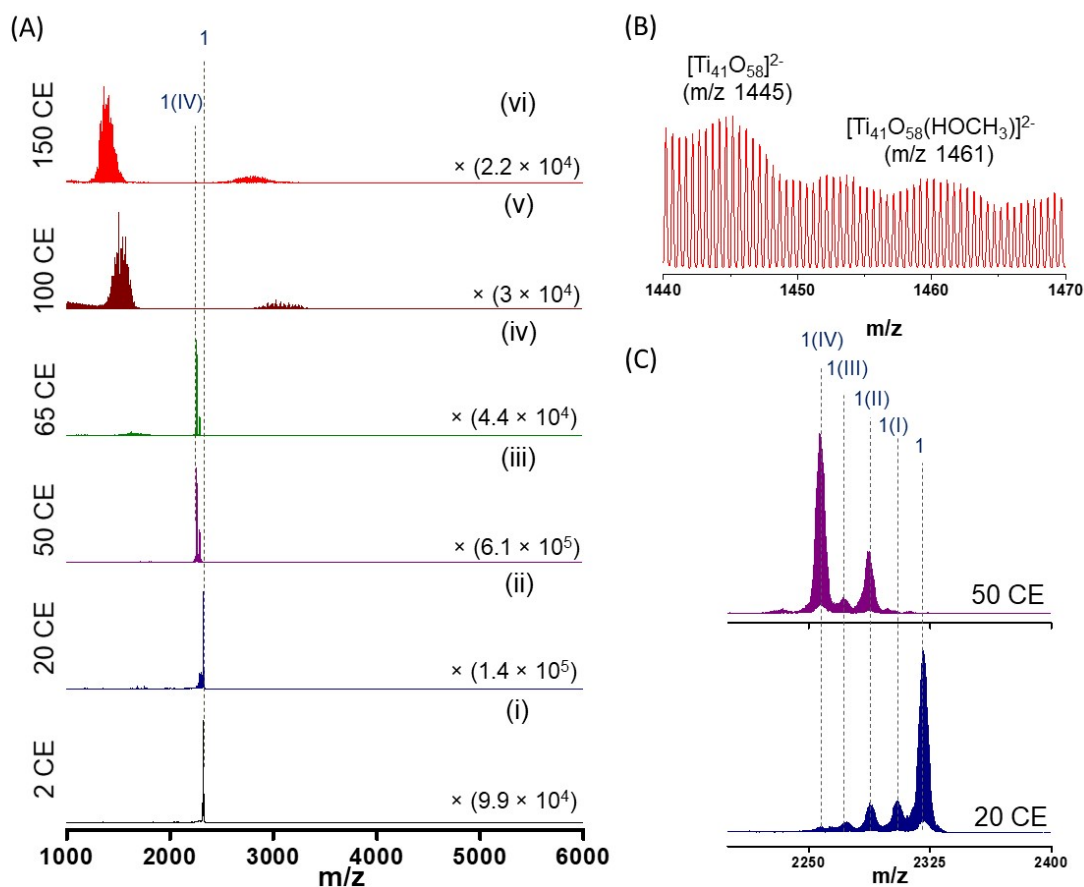

**Fig. S3** Detailed CID mass spectrum of  $[\text{H}_{12}\text{Ti}_{42}\text{O}_{60}(\text{OCH}_3)_{42}(\text{HOCH}_3)_{10}(\text{H}_2\text{O})_2]^{2-}$  (**1**) with gradual increase of collision energy. (A) MS/MS spectra from 2-150 CE. (B) shows the expanded view of the spectrum at 150 CE in the m/z range of m/z 1440-1470. Mass spectrum of  $[\text{Ti}_{41}\text{O}_{58}]^{2-}$  and  $[\text{Ti}_{41}\text{O}_{58}(\text{HOCH}_3)]^{2-}$  are labeled at m/z 1445 and m/z 1461 respectively. (C) shows the expanded spectra in m/z range of 2200-2400 at 20 CE and 50 CE. 1(I), 1(II), 1(III) and 1(IV) correspond to one, two, three, and four methanol loss species from the precursor ion **1**, with molecular formulae  $[\text{H}_{11}\text{Ti}_{42}\text{O}_{60}(\text{OCH}_3)_{41}(\text{HOCH}_3)_{10}(\text{H}_2\text{O})_2]^{2-}$ ,  $[\text{H}_{10}\text{Ti}_{42}\text{O}_{60}(\text{OCH}_3)_{40}(\text{HOCH}_3)_{10}(\text{H}_2\text{O})_2]^{2-}$ ,  $[\text{H}_9\text{Ti}_{42}\text{O}_{60}(\text{OCH}_3)_{39}(\text{HOCH}_3)_{10}(\text{H}_2\text{O})_2]^{2-}$ ,  $[\text{H}_8\text{Ti}_{42}\text{O}_{60}(\text{OCH}_3)_{38}(\text{HOCH}_3)_{10}(\text{H}_2\text{O})_2]^{2-}$ , respectively.

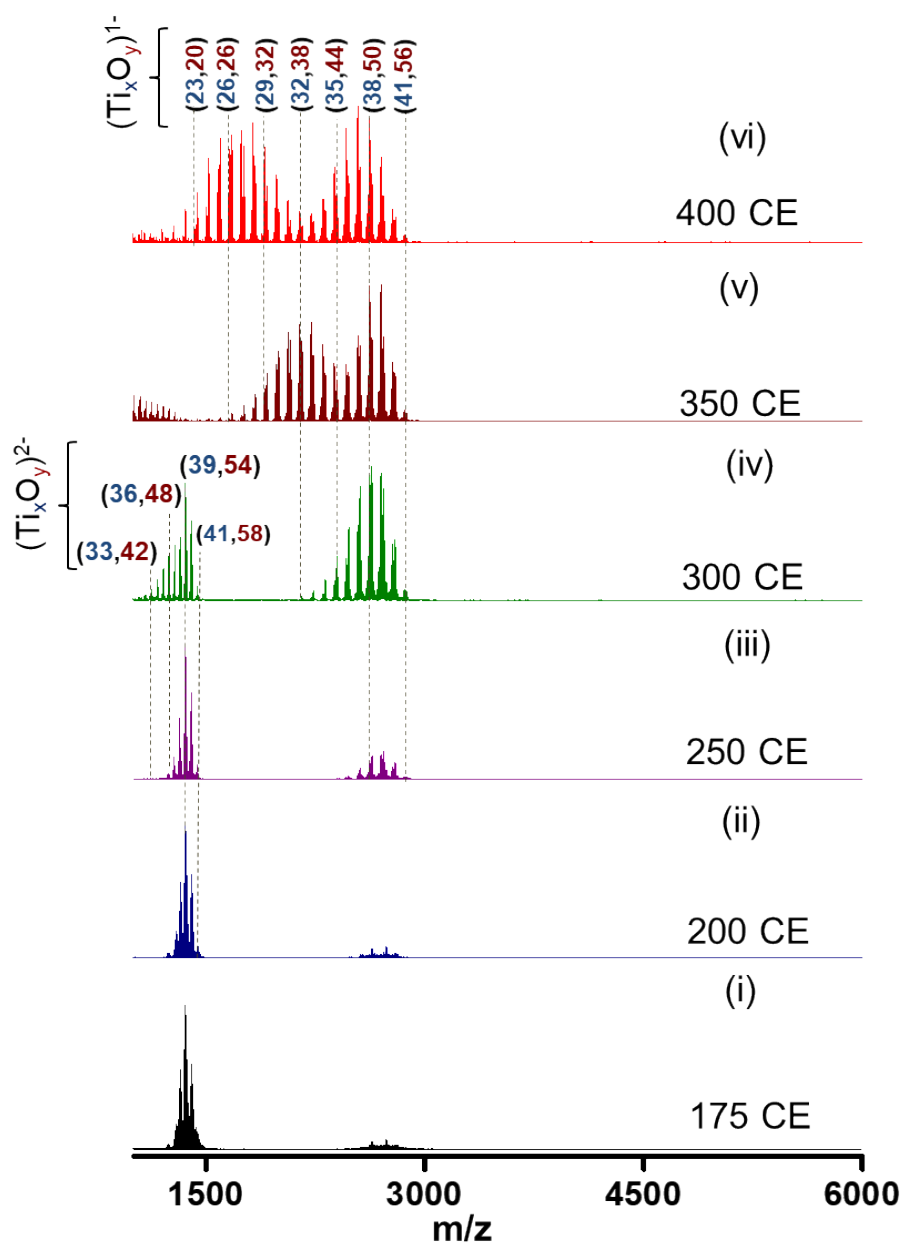

**Fig. S4** Detailed CID mass spectrum of  $[H_{12}Ti_{42}O_{60}(OCH_3)_{42}(HOCH_3)_{10}(H_2O)_2]^{2-}$  (1) with the gradual increase of CE from 175- 400 CE.

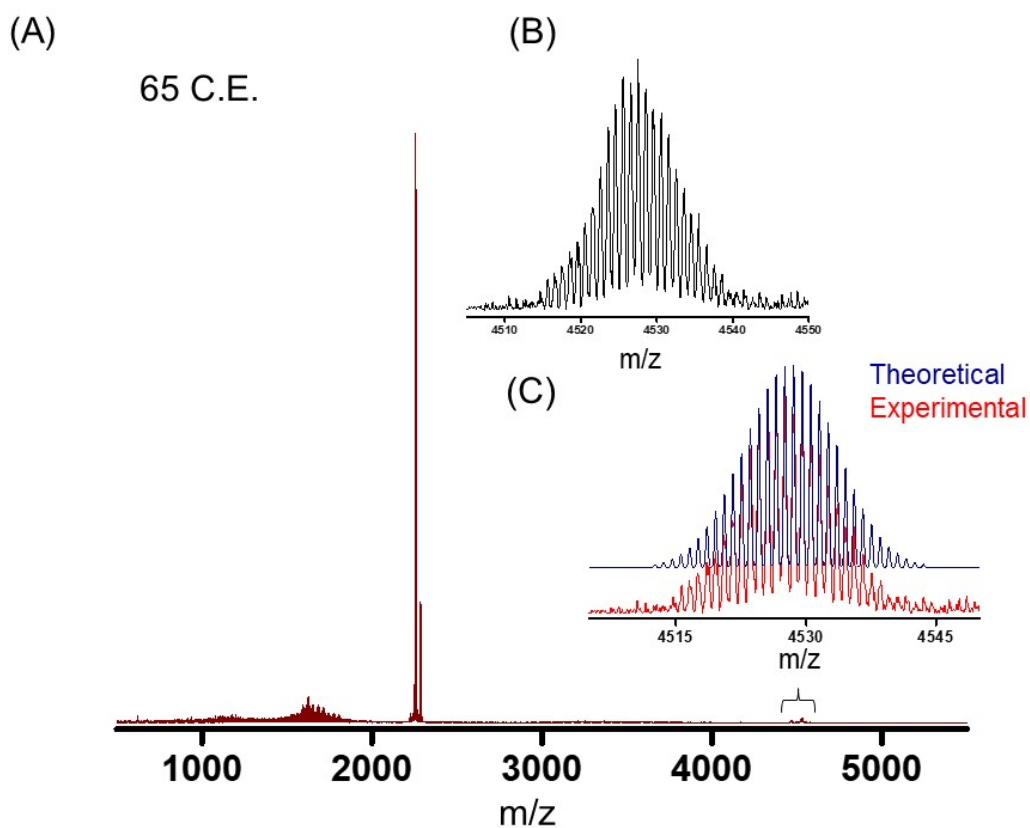

**Fig. S5** (A). CID mass spectrum of  $[H_{12}Ti_{42}O_{60}(OCH_3)_{42}(HOCH_3)_{10}(H_2O)_2]^{2-}$  at 65 C.E. (B) Expanded view of mass spectrum of  $[H_7Ti_{42}O_{60}(OCH_3)_{38}(HOCH_3)_{10}(H_2O)_3]^{1-}$ . (C) Theoretical and experimental mass spectrum of  $[H_7Ti_{42}O_{60}(OCH_3)_{38}(HOCH_3)_{10}(H_2O)_3]^{1-}$ .

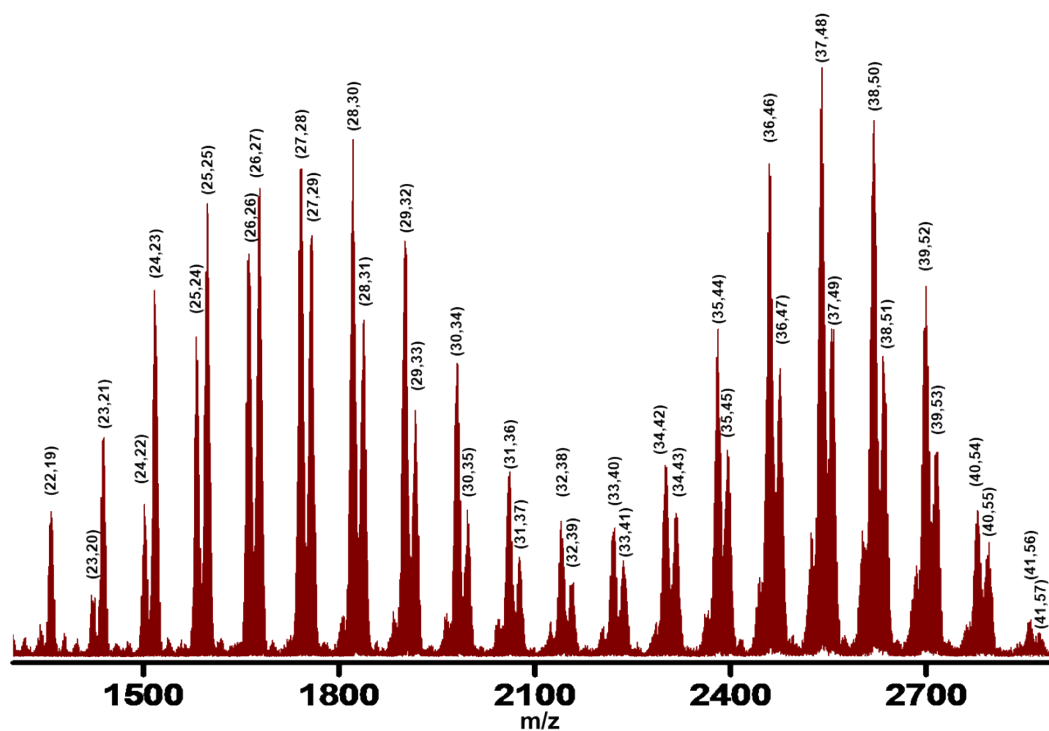

**Fig. S6** CID mass spectrum of  $[\text{H}_{12}\text{Ti}_{42}\text{O}_{60}(\text{OCH}_3)_{42}(\text{HOCH}_3)_{10}(\text{H}_2\text{O})_2]^{2-}$  at 400 C.E. A cascade of Ti-oxo cage fragments were generated. The peaks are labeled as (x,y) where x and y represent the number of Ti and O atoms present in the cage fragments.

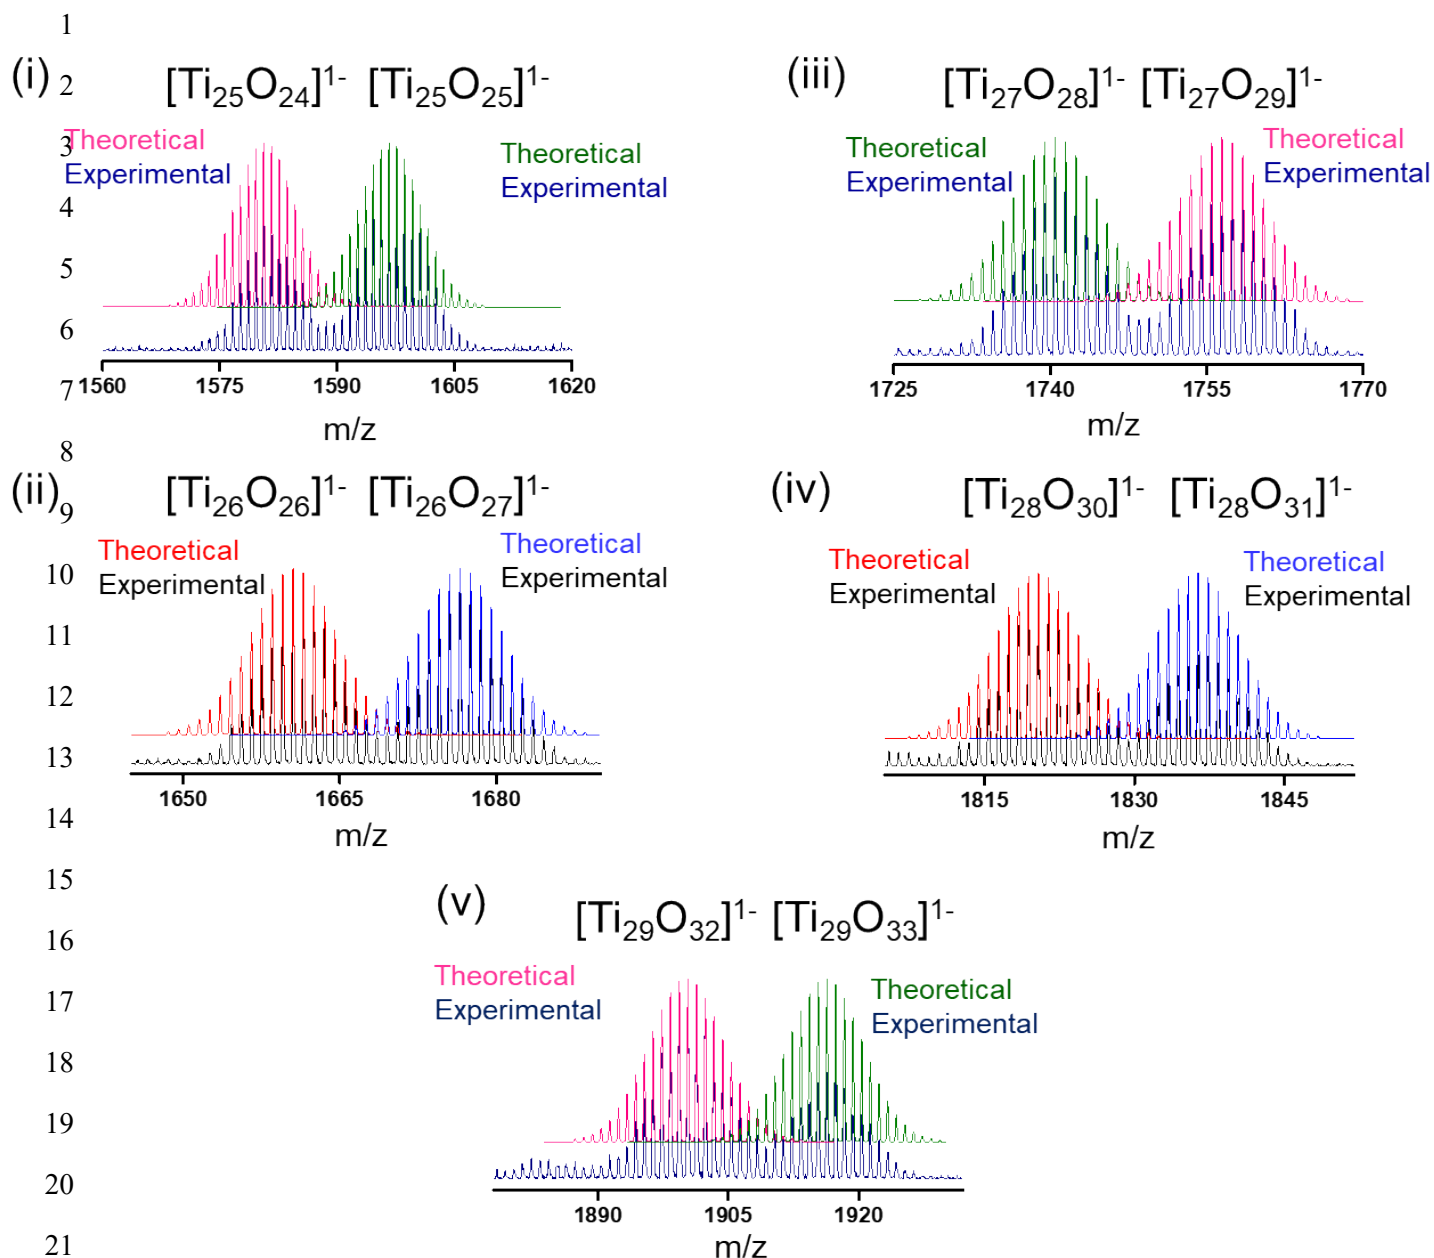

**Fig. S7** Expanded views of the calculated and experimental isotopic distributions of (i)  $[\text{Ti}_{25}\text{O}_{24}]^{1-}$ ,  $[\text{Ti}_{25}\text{O}_{25}]^{1-}$ ; (ii)  $[\text{Ti}_{26}\text{O}_{26}]^{1-}$ ,  $[\text{Ti}_{26}\text{O}_{27}]^{1-}$ ; (iii)  $[\text{Ti}_{27}\text{O}_{28}]^{1-}$ ,  $[\text{Ti}_{27}\text{O}_{29}]^{1-}$ ; (iv)  $[\text{Ti}_{28}\text{O}_{30}]^{1-}$ ,  $[\text{Ti}_{28}\text{O}_{31}]^{1-}$  and (v)  $[\text{Ti}_{29}\text{O}_{32}]^{1-}$ ,  $[\text{Ti}_{29}\text{O}_{33}]^{1-}$ .

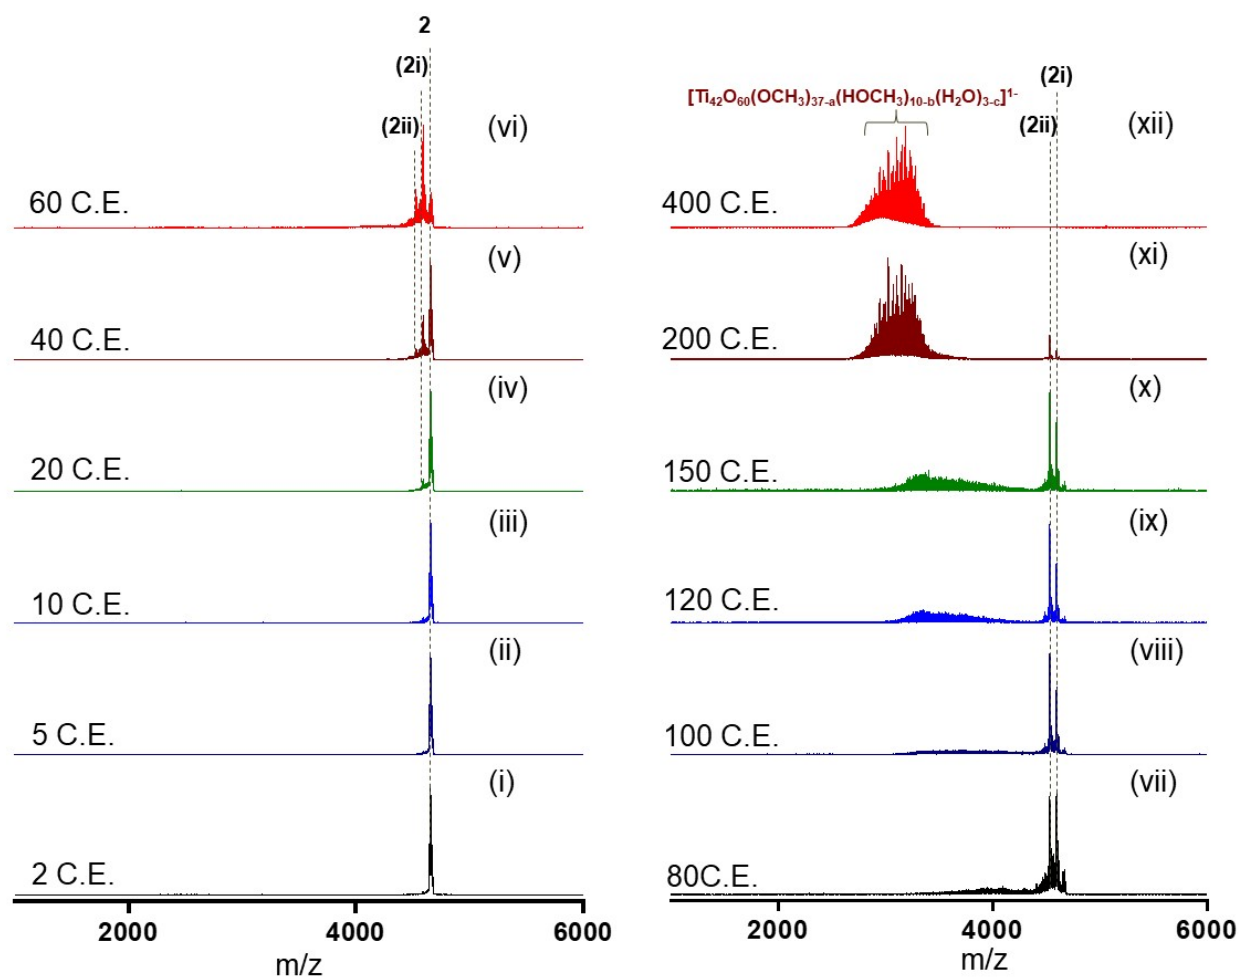

19

20 **Fig. S8** CID mass spectra of  $[\text{H}_7\text{Ti}_{42}\text{O}_{60}(\text{OCH}_3)_{42}(\text{HOCH}_3)_{10}(\text{H}_2\text{O})_3]^{1-}$  (**2**) with gradual increase  
 21 of collision energy from 2 C.E. to 400 C.E. **2i** and **2ii** indicate two and four methanol loss  
 22 species, respectively from **2**.

23

24

25

26

27

28

29

30

31

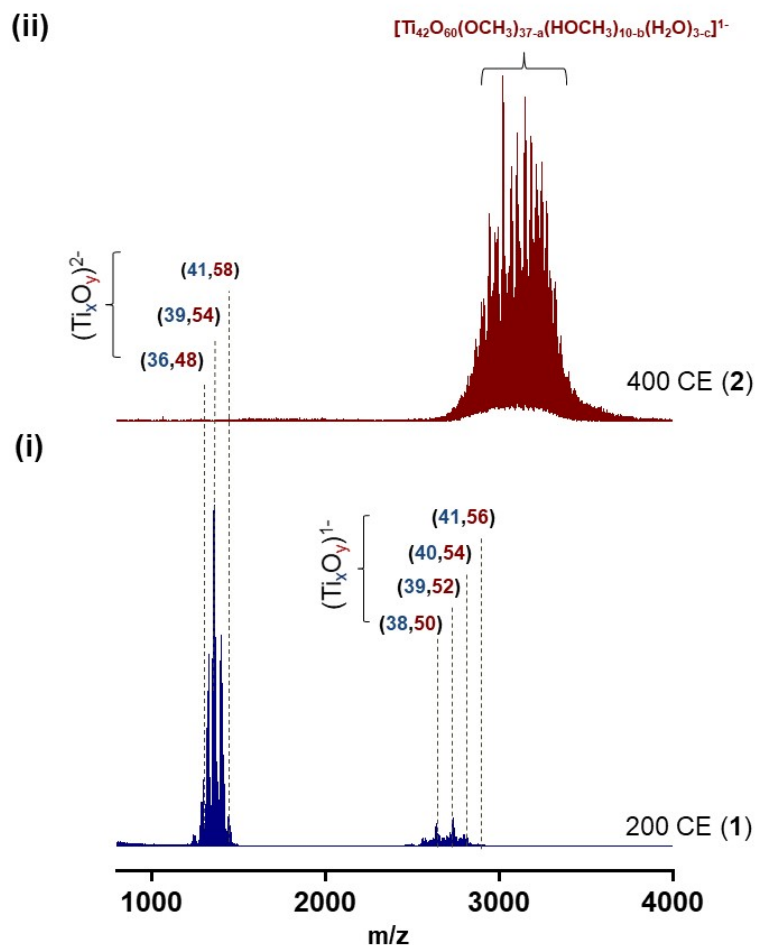

**Fig. S9** Stacked mass spectra of parent ions, **1** at 200 CE (i) and **2** at 400 CE (ii).

**S11 Additional details of computational study** – DFT calculations were performed with the GPAW method. The atom PAW setups were used as Ti ( $3s^24s^23p^63d^2$ ), O ( $2s^22p^4$ ), C ( $2s^22p^2$ ), and H( $1s^1$ ) to denote the adequate valance electronic interactions in the calculations. The initial structure of **1** was optimized by taking the crystal structure of TOF, as reported by Gao et al and removing its 6Hs.<sup>1</sup> All geometry optimizations were carried out with a grid spacing of 0.2 Å° and standard force minimization conditions. PBE exchange functional and double zeta polarization (DZP) basis set were used only because these are accurate enough to give reasonably accuracy for metal cluster systems and are widely used combination in atomic-orbital DFT simulations for nanoclusters.<sup>2-4</sup>

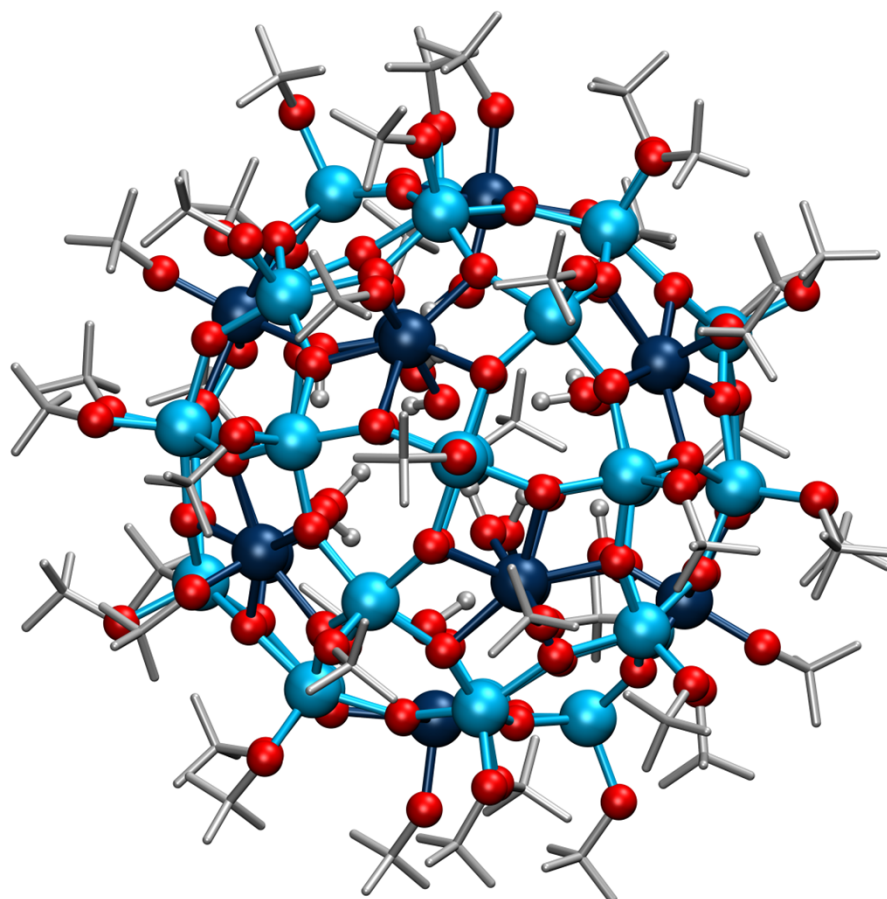

**Fig. S10** Theoretically optimized structure of  $H_6[Ti_{42}O_{60}(OCH_3)_{42}(OH)_{12}]$ ,  $E = -2204.21$  eV.

(A)

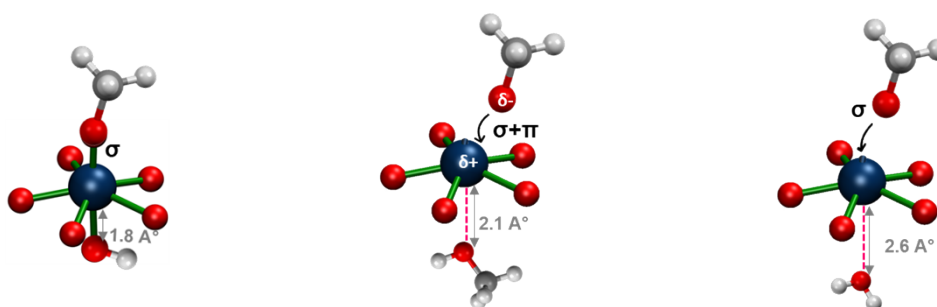

(i) Ti1 centre of TOF

(ii) Ti1 centre nearest to methanol  
in Cluster 1

(iii) Ti1 centre near to H<sub>2</sub>O in  
Cluster 1

**Fig. S11** Various binding modes and types of electron donation of the methoxide ligand with the Ti1 centre, obtained from DFT models. (i) Sigma bonding between methoxide and Ti1 centre of TOF, (ii) sigma and pi electron donation from methoxide ligand to Ti1 atom which is near to methanol molecules in cluster 1 and (iii) only sigma bonding between methoxy and Ti1 centre which is near to the cage-H<sub>2</sub>O molecules.

**S12 Explanation of difference in charges between protonated and unprotonated  $[Ti_{42}O_{60}(MeO)_{42}(MeOH)_{10}(H_2O)_2]^{-2}$**

1

2 It is likely that in the gas phase the hydrogen atoms are strongly bonded to the bridging O sites  
 3 on the surface of the cage, while in the crystal and solution phase the extra hydrogen atoms are  
 4 more loosely bound to the cluster. This being the case we may treat the twelve H atoms as  
 5 additional acceptor atoms to the ligands of the cluster. We know from the crystal structure of  
 6 TOF that there are six preferential sites octahedrally arranged for the six hydrogen atoms  
 7 though we do not know their exact placement and when we have twelve hydrogen atoms due  
 8 to symmetry considerations, they will be bonded to the bridging O atoms as six pairs of  
 9 hydrogen atoms at these six octahedral sites with each H atom donating  $1e$ .

10 We verified that the single-electron donation of H to Ti indeed yields the overall cluster  $-2$   
 11 charge according to the standard textbook rules for calculating the charges of organometallic  
 12 complexes and we only assumed that the two water molecules and ten methanol molecules  
 13 inside the cage do not donate electrons to Ti. Assuming an oxidation state of 4 for Ti the number  
 14 of charges on Ti atoms is  $42 \times 4e = 168e$ . Twelve H atoms are in  $+1$  oxidation state, so electrons  
 15 accepted by Hs are  $12 \times 1e = 12e$ . The charges donated by ligands are as following the 10 -OMe  
 16 ligands (connected to Ti1, close to MeOH) ( $10 \times 3e = 30e$ ), 2 -OMe ligands (connected to Ti1,  
 17 close to  $H_2O$ ) ( $2 \times 1e = 2e$ ). Remaining 30 -OMe (Ti2 site) ligands and 60  $\mu_3$ -bridging atoms  
 18 donate ( $30 \times 1e = 30e$ ), ( $60 \times 2e = 120e$ ) respectively to the Ti atoms. Therefore, total charges  
 19 donated by ligands is  $(30+2+30+120)e = 182e$  to Ti. Therefore, the charge on the cluster is  
 20  $168+12-182 = -2$ .

21

22

23

24

25

26

27

28

29

30

31

32

33

34

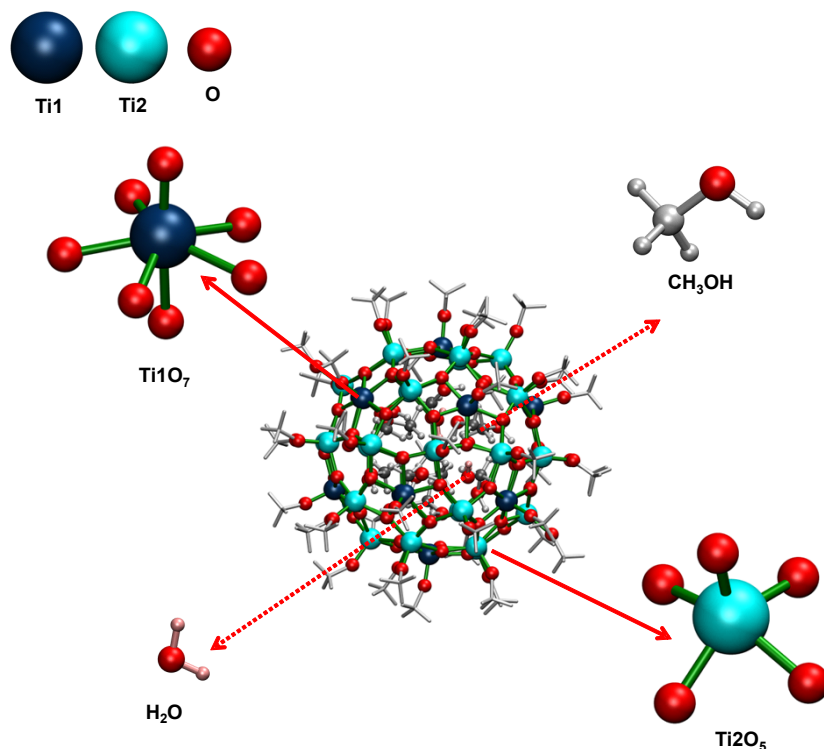

35 **Fig. S12** Theoretically optimized structure of  $[H_{12}Ti_{42}O_{60}(CH_3O)_{42}(CH_3OH)_{10}(H_2O)_2]^{2-}$  (**1**) All  
 36 constituent molecules such as  $Ti1O_7$ ,  $Ti2O_5$ ,  $CH_3OH$ ,  $H_2O$  are labelled.

37

(A)

(i)

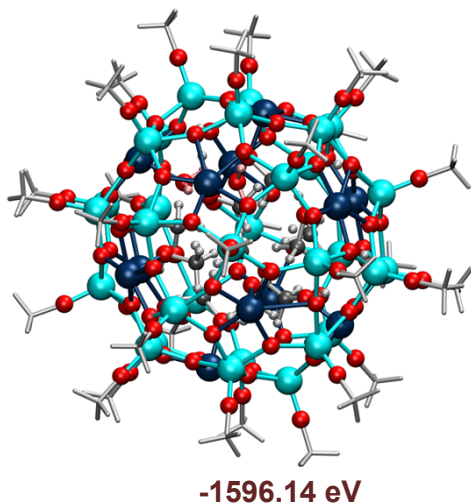

-1596.14 eV

(ii)

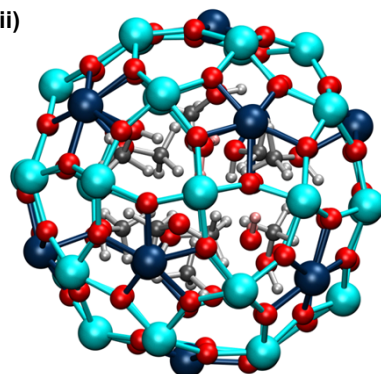

-1197.66 eV

Energy (eV)

m/z

**Fig. S13** Theoretically optimized structures of intermediates (i)  $[\text{H}_{12}\text{Ti}_{42}\text{O}_{60}(\text{CH}_3\text{O})_{30}(\text{CH}_3\text{OH})_{10}(\text{H}_2\text{O})_2]^{2-}$  (ii)  $[\text{H}_{12}\text{Ti}_{41}\text{O}_{58}(\text{CH}_3\text{OH})_{10}(\text{H}_2\text{O})_2]^{2-}$  formed during gas phase fragmentation.

**Table S1** Electron count for various constituents of **1**.

| Formula                                  | No. of electrons donated / lost by each atom | No. of ligands/metal atoms | Total of charge of electron contribution | Total charge (e <sup>-</sup> ) |
|------------------------------------------|----------------------------------------------|----------------------------|------------------------------------------|--------------------------------|
| Ti1                                      | 4                                            | 12                         | 48                                       | 180                            |
| Ti2                                      | 4                                            | 30                         | 120                                      |                                |
| H                                        | 1                                            | 12                         | 12                                       |                                |
| MeO (Ti1 site close to MeOH)             | 3                                            | 10                         | -30                                      | -182                           |
| MeO (Ti1 site close to H <sub>2</sub> O) | 1                                            | 2                          | -2                                       |                                |
| MeO(Ti2 site)                            | 1                                            | 30                         | -30                                      |                                |
| μ <sub>3</sub> -O                        | 2                                            | 60                         | -120                                     |                                |
| CH <sub>3</sub> (OH)                     | 0                                            | 10                         | 0                                        |                                |
| H <sub>2</sub> O                         | 0                                            | 2                          | 0                                        |                                |
| Total charge                             |                                              |                            |                                          | -2                             |

1  
2  
3  
4  
5

6 **Table S2:** Comparison of Bader charges of the caged methanol molecules in cluster **1**. Labels  
7 1, 2, 3, 4, 5, 6, 7, 8, 9 and 10 refer to each of the 10 methanol molecules.

| Atoms       | Isolated methanol<br>(e-) | In cluster 1<br>(e-) | Sum of each<br>methanol<br>(e-) |
|-------------|---------------------------|----------------------|---------------------------------|
| <b>1) O</b> | -1.073469                 | -1.125902            |                                 |
| <b>H</b>    | 0.550502                  | 0.580965             |                                 |
| <b>C</b>    | 0.405900                  | 0.374355             |                                 |
| <b>H</b>    | 0.053647                  | 0.122978             |                                 |
| <b>H</b>    | 0.014493                  | 0.059993             |                                 |
| <b>H</b>    | 0.048936                  | -0.018294            | -0.005905                       |
| <b>2) O</b> |                           | -1.158572            |                                 |
| <b>H</b>    |                           | 0.612039             |                                 |
| <b>C</b>    |                           | 0.395603             |                                 |
| <b>H</b>    |                           | 0.082344             |                                 |
| <b>H</b>    |                           | 0.000059             |                                 |
| <b>H</b>    |                           | 0.056760             | -0.011767                       |
| <b>3) O</b> |                           | -1.143032            |                                 |
| <b>H</b>    |                           | 0.580766             |                                 |
| <b>C</b>    |                           | 0.381641             |                                 |
| <b>H</b>    |                           | 0.005621             |                                 |
| <b>H</b>    |                           | 0.058059             |                                 |
| <b>H</b>    |                           | 0.089870             | -0.027075                       |
| <b>4) O</b> |                           | -1.130505            |                                 |
| <b>H</b>    |                           | 0.572016             |                                 |

|             |  |           |           |
|-------------|--|-----------|-----------|
| <b>C</b>    |  | 0.341842  |           |
| <b>H</b>    |  | 0.101267  |           |
| <b>H</b>    |  | 0.020504  |           |
| <b>H</b>    |  | 0.086536  | -0.00834  |
| <b>5) O</b> |  | -1.151216 |           |
| <b>H</b>    |  | 0.590230  |           |
| <b>C</b>    |  | 0.382089  |           |
| <b>H</b>    |  | 0.062989  |           |
| <b>H</b>    |  | -0.030719 |           |
| <b>H</b>    |  | 0.090837  | -0.05579  |
| <b>6) O</b> |  | -1.147379 |           |
| <b>H</b>    |  | 0.589789  |           |
| <b>C</b>    |  | 0.307513  |           |
| <b>H</b>    |  | -0.012398 |           |
| <b>H</b>    |  | 0.109244  |           |
| <b>H</b>    |  | 0.095780  | -0.057451 |
| <b>7) O</b> |  | -1.141296 |           |
| <b>H</b>    |  | 0.581964  |           |
| <b>C</b>    |  | 0.352674  |           |
| <b>H</b>    |  | 0.057328  |           |
| <b>H</b>    |  | 0.024900  |           |
| <b>H</b>    |  | 0.086162  | -0.038268 |
| <b>8) O</b> |  | -1.151764 |           |
| <b>H</b>    |  | 0.594026  |           |
| <b>C</b>    |  | 0.321497  |           |
| <b>H</b>    |  | 0.105723  |           |
| <b>H</b>    |  | 0.073583  |           |
| <b>H</b>    |  | 0.038504  | -0.018431 |
| <b>9) O</b> |  | -1.101824 |           |

| Atoms | Isolated water<br>(e-) | In cluster 1<br>(e-)                              | Sum of each water<br>(e-) |
|-------|------------------------|---------------------------------------------------|---------------------------|
| 1) O  | -1.094402              | -1.174572                                         |                           |
| H     | 0.547159               | 0.569319                                          |                           |
| H     | 0.547249               | 0.615906                                          | 0.053807                  |
| H     |                        | 0.564074                                          |                           |
| C     |                        | 0.368489                                          |                           |
| H     |                        | 0.019425                                          |                           |
| H     |                        | 0.046601                                          |                           |
| 10) O |                        | -1.157097                                         |                           |
| H     |                        | 0.602332                                          |                           |
| C     |                        | 0.369650                                          |                           |
| H     |                        | 0.015565                                          |                           |
| H     |                        | 0.040704                                          |                           |
| H     |                        | 0.098016                                          | -0.03083                  |
|       |                        | <b>Total charge on ten<br/>methanol molecules</b> | -0.282348                 |

**Table S3:** Comparison of Bader charges of caged water molecules in the isolated molecule case and in cluster 1.

|             |  |                                             |           |
|-------------|--|---------------------------------------------|-----------|
| <b>2) O</b> |  | -1.173333                                   |           |
| <b>H</b>    |  | 0.573600                                    |           |
| <b>H</b>    |  | 0.576726                                    | -0.023007 |
|             |  | <b>Total charge on both water molecules</b> | -0.012354 |

**Table S4:** Average Bader charges of ligated molecules in  $[\text{Ti}_{42}(\mu^3\text{-O})_{60}(\text{OCH}_3)_{42}(\text{OH})_{12}]^{6-}$  [computed structure for (TOF)] and in cluster **1**.

| <b>Atoms</b>                       | <b>Average charges in TOF<br/>(e-)</b> | <b>Average charges in cluster<br/>ion 1<br/>(e-)</b> |
|------------------------------------|----------------------------------------|------------------------------------------------------|
| <b>OCH<sub>3</sub>(Ti1 bonded)</b> | -0.57638                               | -0.36619                                             |
| <b>OCH<sub>3</sub>(Ti2 bonded)</b> | -0.57511                               | -0.41631                                             |
| <b>OH</b>                          | -0.57386                               | -                                                    |
| <b>HOCH<sub>3</sub></b>            | -                                      | -0.0282348                                           |
| <b>H<sub>2</sub>O</b>              | -                                      | -0.012354                                            |

## References

- 1 M.-Y. Gao, F. Wang, Z.-G. Gu, D.-X. Zhang, L. Zhang and J. Zhang, Fullerene-like Polyoxotitanium Cage with High Solution Stability, *J. Am. Chem. Soc.*, 2016, **138**, 2556–2559.
- 2 A. H. Larsen, M. Vanin, J. J. Mortensen, K. S. Thygesen and K. W. Jacobsen,

- 1       Localized atomic basis set in the projector augmented wave method, *Phys. Rev. B -*  
2       *Condens. Matter Mater. Phys.*, 2009, **80**, 195112.
- 3   3       P. Chakraborty, A. Nag, B. Mondal, E. Khatun, G. Paramasivam and T. Pradeep,  
4       Fullerene-Mediated Aggregation of  $M_{25}(SR)_{18}^-(M = Ag, Au)$  Nanoclusters, *J. Phys.*  
5       *Chem. C*, 2020, **124**, 14891–14900.
- 6   4       A. Nag, P. Chakraborty, G. Paramasivam, M. Bodiuzzaman, G. Natarajan and T.  
7       Pradeep, Isomerism in Supramolecular Adducts of Atomically Precise Nanoparticles,  
8       *J. Am. Chem. Soc.*, 2018, **140**, 13590–13593.
